# Supplementary material for: Psychiatric Symptoms and Alcohol Use in Community Violence by Persons With a Psychotic Disorder or Depression
Source: Atypon-hosted journal article supplement (doi:10.1176/appi.ps.201100354), 2012-03-01
Supplement: pss6303_0262_ds.pdf [file pss6303_0262_ds.pdf]

Table S1. Violence at time (t) predicted by variables at time (t)

| Variable                                  | BPRS Affect       |             |                    |                   |             |                    | BPRS Positive     |             |                    |                  |             |                    | Both Affect and Positive |             |                    |                  |             |                    |
|-------------------------------------------|-------------------|-------------|--------------------|-------------------|-------------|--------------------|-------------------|-------------|--------------------|------------------|-------------|--------------------|--------------------------|-------------|--------------------|------------------|-------------|--------------------|
|                                           | Depression        |             |                    | Psychotic         |             |                    | Depression        |             |                    | Psychotic        |             |                    | Depression               |             |                    | Psychotic        |             |                    |
|                                           | Groups (N)        |             | 385                | Groups (N)        |             | 200                | Groups (N)        |             | 383                | Groups (N)       |             | 199                | Groups (N)               |             | 383                | Groups (N)       |             | 199                |
|                                           | Observations      |             | 1575               | Observations      |             | 820                | Observations      |             | 1513               | Observations     |             | 808                | Observations             |             | 1511               | Observations     |             | 807                |
|                                           | OR                | SE          | 95% CI             | OR                | SE          | 95% CI             | OR                | SE          | 95% CI             | OR               | SE          | 95% CI             | OR                       | SE          | 95% CI             | OR               | SE          | 95% CI             |
| <b>Age</b>                                | 0.99              | 0.02        | 0.95 - 1.03        | 0.98              | 0.03        | 0.91 - 1.04        | 1.00              | 0.02        | 0.96 - 1.04        | 0.97             | 0.03        | 0.90 - 1.03        | 0.99                     | 0.02        | 0.95 - 1.03        | 0.97             | 0.03        | 0.90 - 1.03        |
| <b>Male</b>                               | 1.56              | 0.40        | 0.94 - 2.57        | 1.57              | 0.76        | 0.60 - 4.07        | 1.27              | 0.31        | 0.79 - 2.06        | 1.26             | 0.59        | 0.50 - 3.18        | 1.41                     | 0.36        | 0.86 - 2.33        | 1.26             | 0.59        | 0.50 - 3.18        |
| <b>Affective subscale score (t)</b>       | <b>1.10*</b>      | <b>0.03</b> | <b>1.06 - 1.15</b> | 1.04              | 0.04        | 0.96 - 1.12        |                   |             |                    |                  |             |                    | <b>1.07*</b>             | <b>0.03</b> | <b>1.03 - 1.12</b> | 1.01             | 0.04        | 0.93 - 1.09        |
| <b>Positive subscale score (t)</b>        |                   |             |                    |                   |             |                    | <b>1.27*</b>      | <b>0.06</b> | <b>1.16 - 1.38</b> | <b>1.11*</b>     | <b>0.04</b> | <b>1.03 - 1.20</b> | <b>1.23*</b>             | <b>0.06</b> | <b>1.12 - 1.34</b> | <b>1.11*</b>     | <b>0.05</b> | <b>1.03 - 1.21</b> |
| <b>Alcohol amount (t) drinks per week</b> | <b>1.56*</b>      | <b>0.14</b> | <b>1.31 - 1.87</b> | <b>1.57*</b>      | <b>0.26</b> | <b>1.13 - 2.19</b> | <b>1.59*</b>      | <b>0.14</b> | <b>1.34 - 1.90</b> | <b>1.59*</b>     | <b>0.26</b> | <b>1.15 - 2.20</b> | <b>1.55*</b>             | <b>0.14</b> | <b>1.30 - 1.85</b> | <b>1.58*</b>     | <b>0.26</b> | <b>1.14 - 2.19</b> |
| <b>Within subject correlation (ρ)</b>     | 0.28              | 0.07        | 0.17 - 0.44        | 0.40              | 0.12        | 0.21 - 0.63        | 0.24              | 0.08        | 0.12 - 0.42        | 0.36             | 0.12        | 0.17 - 0.61        | 0.26                     | 0.08        | 0.14 - 0.43        | 0.36             | 0.12        | 0.17 - 0.61        |
| <b>Xbar<sup>2</sup></b>                   | 17.37 (p = 0.000) |             |                    | 11.95 (p = 0.000) |             |                    | 11.11 (p = 0.000) |             |                    | 9.39 (p = 0.001) |             |                    | 13.01 (p = 0.000)        |             |                    | 9.13 (p = 0.001) |             |                    |

Table S2. Violence at time (t+1) predicted by variables at time (t)

| Variable                           | BPRS Affect     |             |                    |                  |             |                    | BPRS Positive    |             |                    |                  |             |                    | Both Affect and Positive |             |                    |                  |             |                    |        |
|------------------------------------|-----------------|-------------|--------------------|------------------|-------------|--------------------|------------------|-------------|--------------------|------------------|-------------|--------------------|--------------------------|-------------|--------------------|------------------|-------------|--------------------|--------|
|                                    | Depression      |             |                    | Psychotic        |             |                    | Depression       |             |                    | Psychotic        |             |                    | Depression               |             |                    | Psychotic        |             |                    |        |
|                                    | Groups (N)      |             | 349                | Groups (N)       |             | 182                | Groups (N)       |             | 347                | Groups (N)       |             | 182                | Groups (N)               |             | 347                | Groups (N)       |             | 182                |        |
|                                    | Observations    |             | 1129               | Observations     |             | 586                | Observations     |             | 1092               | Observations     |             | 581                | Observations             |             | 1090               | Observations     |             | 580                |        |
| OR                                 |                 | SE          | 95% CI             | OR               |             | SE                 | 95% CI           | OR          |                    | SE               | 95% CI      | OR                 |                          | SE          | 95% CI             | OR               |             | SE                 | 95% CI |
| Age                                | 1.02            | 0.02        | 0.97 – 1.07        | 0.98             | 0.03        | 0.92 - 1.05        | 1.03             | 0.02        | 0.98 - 1.08        | 0.98             | 0.03        | 0.91 - 1.05        | 1.02                     | 0.02        | 0.97 - 1.07        | 0.98             | 0.03        | 0.91 - 1.04        |        |
| Male                               | 1.31            | 0.39        | 0.73 – 2.34        | 1.30             | 0.62        | 0.51 - 3.30        | 1.15             | 0.34        | 0.64 - 2.05        | 1.21             | 0.59        | 0.47 - 3.12        | 1.27                     | 0.38        | 0.70 - 2.29        | 1.21             | 0.58        | 0.47 - 3.10        |        |
| Violence (t)                       | <b>3.62*</b>    | <b>1.32</b> | <b>1.76 – 7.41</b> | 2.61             | 1.99        | 0.58 - 11.65       | <b>3.54*</b>     | <b>1.34</b> | <b>1.69 - 7.45</b> | 2.10             | 1.66        | 0.44 - 9.93        | <b>3.51*</b>             | <b>1.32</b> | <b>1.68 – 7.34</b> | 2.20             | 1.77        | 0.45 - 10.64       |        |
| Affective subscale score (t)       | <b>1.09*</b>    | <b>0.04</b> | <b>1.02 – 1.16</b> | 1.03             | 0.04        | 0.94 - 1.11        |                  |             |                    |                  |             |                    | <b>1.08*</b>             | <b>0.04</b> | <b>1.01 – 1.16</b> | 1.01             | 0.04        | 0.93 - 1.11        |        |
| Positive subscale score (t)        |                 |             |                    |                  |             |                    | 1.07             | 0.06        | 0.95 - 1.19        | 1.03             | 0.05        | 0.94 - 1.13        | 1.05                     | 0.06        | 0.94 - 1.18        | 1.03             | 0.05        | 0.93 - 1.13        |        |
| Alcohol amount (t) drinks per week | <b>2.58*</b>    | <b>0.74</b> | <b>1.47 – 4.54</b> | <b>1.61*</b>     | <b>0.28</b> | <b>1.14 - 2.27</b> | <b>1.44*</b>     | <b>0.17</b> | <b>1.14 - 1.82</b> | <b>1.62*</b>     | <b>0.29</b> | <b>1.14 - 2.30</b> | <b>2.66*</b>             | <b>0.78</b> | <b>1.50 – 4.73</b> | <b>1.59*</b>     | <b>0.29</b> | <b>1.11 - 2.28</b> |        |
| Interaction of Affective x Alcohol | <b>0.95*</b>    | <b>0.02</b> | <b>0.91 – 1.00</b> |                  |             |                    |                  |             |                    |                  |             |                    | <b>0.95*</b>             | <b>0.02</b> | <b>0.91 – 0.99</b> |                  |             |                    |        |
| Within subject correlation (ρ)     | 0.10            | 0.12        | 0.01 – 0.61        | 0.18             | 0.22        | 0.01 - 0.80        | 0.12             | 0.12        | 0.01 - 0.57        | 0.21             | 0.21        | 0.02 - 0.76        | 0.11                     | 0.13        | 0.01 - 0.60        | 0.19             | 0.22        | 0.01 - 0.80        |        |
| Xbar <sup>2</sup>                  | 0.70 (p = 0.20) |             |                    | 0.62 (p = 0.215) |             |                    | 0.98 (p = 0.162) |             |                    | 0.91 (p = 0.170) |             |                    | 0.78 (p = 0.188)         |             |                    | 0.65 (p = 0.210) |             |                    |        |
